# Supplementary material for: Discontinuation of biologic DMARDs in non-systemic JIA patients: a scoping review of relapse rates and associated factors
Source: PubMed Central journal article supplement (PMC9721079; doi:10.1186/s12969-022-00769-5), 2022-12-05

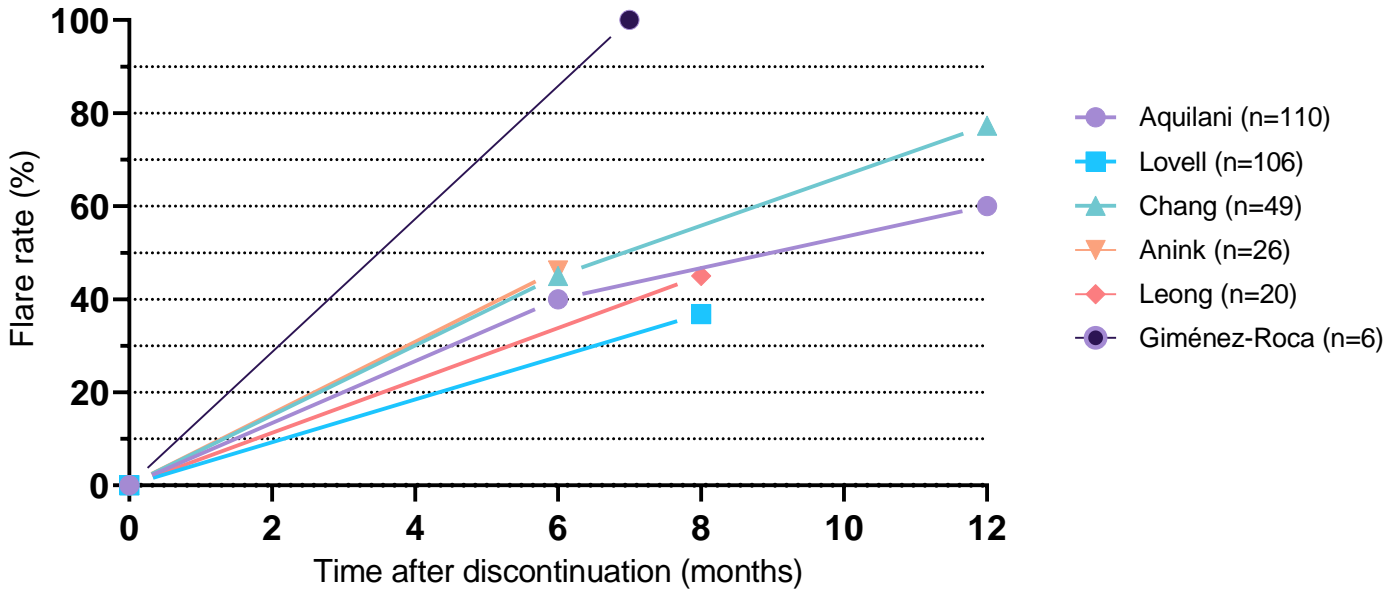

Supplement: 12969_2022_769_MOESM3_ESM.pdf [file 12969_2022_769_MOESM3_ESM.pdf]
